# Diabetes and Depression in the Hispanic/Latino Community

Eduardo Colon, MD, Aida Giachello, PhD, LaShawn McIver, MD, MPH, Guadalupe Pacheco, MSW, and Leonel Vela, MD, MPH

**Editor's note:** *The terms "Hispanic" and "Latino" are used interchangeably to refer to people who were born in or descended from those born in Mexico, Puerto Rico, Cuba, Central or South America, or any other Caribbean island. In this article, the term "Hispanic" is used throughout.*

Nearly 12% of all Hispanics have diabetes, compared to 7.1% of non-Hispanic whites. The prevalence of diagnosed diabetes is not homogenous within subgroups of the Hispanic population, but instead ranges from as low as 7.6% for Cubans to as high as 13.3 and 13.8% for Puerto Rican and Mexican Americans, respectively.<sup>1</sup> Disparities in some diabetes-related complications are also higher among Hispanics compared to non-Hispanic whites.<sup>2,3</sup>

The prevalence rates for depression are significantly higher among adults with diabetes than among those without diabetes.<sup>4</sup> People with type 1 or type 2 diabetes are twice as likely to experience depression.<sup>4</sup> Comorbid depression affects 15–30% of all adults with diabetes and is associated with more diabetes-related symptoms, worse glycemic control, poorer self-management (worse adherence to dietary and medication recommendations, less physical activity, and less frequent glucose monitoring and foot care),<sup>5</sup> higher prevalence of complications, reduced quality of life, and increased mortality.<sup>6–10</sup> Despite that, fewer than 25% of people with diabetes

and depression are adequately treated.<sup>6,11,12</sup>

Limited data exist about the prevalence of comorbid depression among Hispanics. Current research shows that Hispanics with diabetes are less likely to be diagnosed with comorbid depression,<sup>13</sup> despite prevalence rates equal to or higher than rates among non-Hispanic whites,<sup>14</sup> and they are half as likely to receive treatment.<sup>15</sup> This article briefly describes depression in the Hispanic community; the relationship between diabetes, depression, and culture; and how advocacy can play a role in addressing this problem.

## **Depression, Diabetes, and Culture: The Combined Effect**

Studies of Hispanic culture and health often describe Hispanics as having a set of health beliefs and behaviors and definitions of health and illness, including perceived causes of illnesses. Hispanics also stress the role of the family, religion, and other traditional practices depending on their years in the United States and their levels of acculturation and assimilation to the U.S. mainstream society.

Cherrington et al.<sup>6</sup> found that Hispanics with diabetes, when talking about depression, describe depressive symptoms and emotional distress. They use terms such as sadness, apathy, and loss of pleasure and describe more somatic complaints. They also describe lack of motivation to interact with family

members, get out of bed, go to work, and engage in self-care behaviors.<sup>6</sup>

The lack of validated assessment tools for depression in Hispanics may explain why they are least likely to be diagnosed and treated for depression. Hispanics also tend to attribute symptoms of fatigue, low energy, and dizziness to having both diabetes and depression.<sup>6</sup>

Cherrington et al.<sup>6</sup> found that Hispanics who were diagnosed with diabetes had feelings of hopelessness and were upset about the potential consequences of developing complications and that Hispanics who were experiencing difficulties in diabetes management became anxious and depressed. These researchers argue that there is a bi-directional relationship between emotional health and diabetes.

The prevalence of depression varies by age and sex. A study by Liang et al.<sup>16</sup> found higher levels of depressive symptoms (regardless of diabetes) among middle-aged and older Hispanics and blacks than among white Americans of the same age-groups. Compared to white non-Hispanics and African-American woman, Hispanic women have more severe chronic depression. Some studies argue that, in Hispanic women, there is a correlation between depression and exposure to a number of psychosocial and environmental stressors, including poverty, stress associated with single parenting, gender roles, low educational achievement, social isolation,

language barriers, migration, and the processes associated with acculturation and adaptation.<sup>16</sup>

Hispanics are frequently described as having strong family ties (a concept expressed as *familialismo*)<sup>6,17</sup> that protect them from depression and other mental health conditions. For example, there is evidence that the risk of depression is reduced with increasing level of familial support among foreign-born Mexicans.<sup>18</sup> Some studies indicate that the family plays both a positive and a negative role in diabetes; it can be a source of support and a source of stress.<sup>6</sup> The emotional impact of family as social support varies depending on the extent to which individuals feel supported or understood by family members.<sup>6</sup> Men generally report significant family support for their illness (particularly from wives), whereas women often feel unsupported.

Hispanic health research literature also documents a belief in a strong connection between powerful emotions and diabetes, leading some Hispanics to believe that diabetes is the result of a traumatic event (e.g., a car accident or the death of close relative), which is often described as a *susto* (fright). This is based on the culturally bound belief that strong emotions can lead to bodily changes.<sup>6</sup> This perceived connection persists beyond onset and diagnosis of diabetes and into disease management.<sup>6</sup>

In terms of diabetes treatment, some Hispanics seek medical care from traditional healers (*curanderos*) or employ home remedies or over-the-counter medications, particularly when they experience financial or cultural and linguistic barriers to accessing the health and mental health system.<sup>19,20</sup> Finally, the stigma associated with mental illnesses, including depression, affects whether they seek mental health services

such as counseling and whether they start and adhere to antidepressant medications.<sup>21</sup> One study looked at the rates of adherence to psychotropic medications for patients at a community mental health center. Even after controlling for confounders such as age and social support, the adherence rates for monolingual Hispanics were significantly less than for white non-Hispanics.<sup>22</sup>

### The Role of Advocacy

Diabetes is a serious and growing epidemic in the Hispanic community. Understanding depression and diabetes in disparately affected populations is important, not only for providers, but also for policymakers who work to construct health policies addressing the needs of people with diabetes. There is an ongoing need for more studies on comorbid depression and diabetes; for affordable and culturally linguistic assessment, educational, and treatment tools, including the integration of depression education into diabetes management and control; for increased community awareness of the relationship between diabetes and depression; and for a larger bilingual and bicultural diabetes and mental health workforce.

The goal of the American Diabetes Association (ADA) Diabetes Advocates program is to bring attention to issues affecting people living with diabetes and to advocate for public policy solutions. ADA leads this charge for people with diabetes. The ADA's efforts to address the disparate impact of diabetes on Hispanic populations through public policy change is led by its Latino Diabetes Action Council (LDAC). Composed of a cross-section of leaders from the Hispanic community, LDAC provides leadership on numerous legislative efforts, develops public policy strategies, and provides a strong voice for the ADA's focus on

health disparities in its 2012–2015 strategic plan.<sup>23</sup>

How can health professionals get involved and help advocate for patients with diabetes? As demonstrated in this article, we know it is important for people with diabetes and depression to receive proper care so that their depression does not impair their ability to carry out diabetes care tasks and therefore compromise their health status. ADA Diabetes Advocates can influence policies to address these and other issues faced by people with diabetes.

Diabetes Advocates fought for the passage of the Patient Protection and Affordable Care Act (ACA), which includes many new tools in the fight to stop diabetes in the disparately affected populations who represent a disproportionate number of the uninsured or underinsured in the United States. For example, under the ACA, screening for depression is now a preventive service covered at no cost for adults. This means that people with diabetes who may have undiagnosed depression can be screened without having to pay a copayment, have co-insurance, or meet an insurance deductible. Once the law is fully implemented, people with diabetes and depression will no longer be legally denied insurance or forced to pay a higher premium because of a preexisting condition. These and other efforts are crucial to addressing the needs of people in Hispanic communities living with diabetes.

Health care providers play a key role in combating the disparate impact of diabetes and depression on Hispanic populations. Become a champion for all patients by joining ADA's Diabetes Advocates. Information about how to become an advocate is available online at [www.diabetes.org/advocate](http://www.diabetes.org/advocate).

## REFERENCES

- <sup>1</sup>Centers for Disease Control and Prevention: National diabetes fact sheet: national estimates and general information on diabetes and prediabetes in the United States, 2011. Atlanta, Ga., U.S. Department of Health and Human Services, Centers for Disease Control and Prevention, 2011
- <sup>2</sup>Harris MI, Klein R, Cowie CC, Rowland M, Byrd-Holt DD: Is the risk of diabetic retinopathy greater in non-Hispanic blacks and Mexican Americans than in non-Hispanic whites with type 2 diabetes? A U.S. population study. *Diabetes Care* 121:1230–1235, 1998
- <sup>3</sup>Young BA, Maynard C, Boyko EJ: Racial differences in diabetic nephropathy, cardiovascular disease, and mortality in a national population of veterans. *Diabetes Care* 26:2392–2399, 2003
- <sup>4</sup>Anderson RJ, Freedland K, Clouse RE, Lustman PJ: The prevalence of comorbid depression in adults with diabetes: a meta-analysis. *Diabetes Care* 24:1069–1078, 2001
- <sup>5</sup>Gonzalez JS, Safren SA, Cagliero E, Wexler DJ, Delahanty L, Wittenberg E, Blais MA, Meigs JB, Grant RW: Depression, self-care, and medication adherence in type 2 diabetes. *Diabetes Care* 30:2222–2227, 2007
- <sup>6</sup>Cherrington A, Guadalupe X, Ayala BS, Corbie-Smith G: Examining knowledge, attitudes, and beliefs about depression among Latino adults with type 2 diabetes. *Diabetes Educ* 32:603–611, 2006
- <sup>7</sup>de Groot M, Anderson R, Freedland KE, Clouse RE, Lustman PJ: Association of depression and diabetes complications: a meta-analysis. *Psychosom Med* 63:619–630, 2001
- <sup>8</sup>Hanninen JA, Taka JK, Keinänen-Kiukannaniemi SM: Depression in subjects with type 2 diabetes: predictive factors and relation to quality of life. *Diabetes Care* 22:997–998, 1999
- <sup>9</sup>Sullivan MD, O'Connor P, Feeney P, Hire D, Simmons DL, Raisch DW, Fine LJ, Narayan KMV, Ali MK, Katon WJ: Depression predicts all-cause mortality. *Diabetes Care* 35:1708–1715, 2012
- <sup>10</sup>Katon WJ, Rutter C, Simon G, Lin EH, Ludman E, Ciechanowski P, Kinder L, Von Korff M: The association of comorbid depression with mortality in patients with type 2 diabetes. *Diabetes Care* 28:2668–2672, 2005
- <sup>11</sup>Rubin RR, Ciechanowski P, Egede LE, Lin EH, Lustman PJ: Recognizing and treating depression in patients with diabetes. *Curr Diab Rep* 4:119–125, 2004
- <sup>12</sup>Rubin RR, Knowler WC, Ma Y, Marrero DG, Edelstein SL, Walker EA, Garfield SA, Fisher EB, Diabetes Prevention Program Research Group: Depression symptoms and antidepressant medicine use in Diabetes Prevention Program participants. *Diabetes Care* 15:685–690, 2005
- <sup>13</sup>Shah ZC, Huffman FG: Depression among Hispanic women with type 2 diabetes. *Ethn Dis* 15:685–690, 2005
- <sup>14</sup>Black SA, Markides KS: Depressive symptoms and mortality in older Mexican Americans. *Ann Epidemiol* 9:45–52, 1999
- <sup>15</sup>Gross R, Olfson M, Gameroff MJ, Carasquillo O, Shea S, Feder A, Landtigua R, Weissman MM: Depression and glycemic control in Hispanic primary care patients with diabetes. *J Gen Intern Med* 20:460–466, 2005
- <sup>16</sup>Liang J, Xu X, Quiñones AR, Bennett JM, Ye W: Multiple trajectories of depressive symptoms in middle and late life: racial/ethnic variations. *Psychol Aging* 26:761–777, 2011
- <sup>17</sup>Lipton RB, Losey LM, Giachello AL, Mendez J, Girotti MH: Attitudes and issues in treating Latino patients with type 2 diabetes: views of healthcare providers. *Diabetes Educ* 24:67–71, 1998
- <sup>18</sup>Almeida J, Subramanian SV, Kawachi I, Molnar BE: Is blood thicker than water? Social support, depression and the modifying role of ethnicity/nativity status. *J Epidemiol Community Health* 65:51–56, 2011
- <sup>19</sup>Lipton R, Losey L, Giachello AL, Corral M, Girotti MH, Mendez JJ: Factors affecting diabetes treatment and patient education among Latinos: results of a preliminary study in Chicago. *J Med Syst* 20:267–276, 1996
- <sup>20</sup>Giachello AL: Issues of access and use. In *Latino Health in the U.S.: A Growing Challenge*. Molina CW, Aguirre-Molina M, Eds. Washington, D.C., American Public Health Association, 1994, p. 83–111
- <sup>21</sup>Cabassa LJ, Hansen MC, Palinkas LA, Ell K: Azúcar y nervios: explanatory models and treatment experiences of Hispanics with diabetes and depression. *Soc Sci Med* 66:2413–2424, 2008
- <sup>22</sup>Diaz E, Woods SW, Rosenheck RA: Effects of ethnicity on psychotropic medications adherence. *Community Ment Health J* 41:521–537, 2005
- <sup>23</sup>American Diabetes Association: Annual report and strategic plan. Available from <http://www.diabetes.org/about-us/annual-report-and-strategic-plan.html>. Accessed 6 November 2012

*Eduardo Colon, MD, is a member of the ADA LDAC and a psychiatrist in the Department of Psychology at Hennepin County Medical Center in Minneapolis, Minn. Aida Giachello, PhD, is a member of the ADA LDAC and a professor in the Department of Preventive Medicine at the Feinberg School of Medicine at Northwestern University in Chicago. LaShawn McIver, MD, MPH, is the ADA national director of public policy and strategic alliances in Alexandria, Va. Guadalupe Pacheco, MSW, is a member of the ADA LDAC and the senior health advisor to the director at the Office of Minority Health in the U.S. Department of Health and Human Services in Rockville, Md. Leonel Vela, MD, is a member of the ADA LDAC and the regional dean and a professor at the University of Texas Health Science Center in San Antonio.*
